# Supplementary material for: Circulating miRNAs as Epigenetic Mediators of Periodontitis and Preeclampsia Association
Source: Hindawi journal article supplement (doi:10.1155/2022/2771492), 2022-07-11
Supplement: f1 [file 2771492.f1.pdf]

Supplementary Table S1: Circulating DEmiRNAs (adjusted P value <0.05) in Peiodontitis (GSE31568)

| ID              | FDR<br>adjusted P<br>value | Log fold<br>Change |
|-----------------|----------------------------|--------------------|
| hsa-miR-608     | 0.0001                     | 3.8580             |
| hsa-miR-150     | 0.0005                     | 1.8223             |
| hsa-miR-567     | 0.0005                     | 3.0893             |
| hsa-miR-130b    | 0.0005                     | -1.2851            |
| hsa-miR-301b    | 0.0010                     | -1.1932            |
| hsa-miR-758     | 0.0010                     | 2.7725             |
| hsa-miR-890     | 0.0014                     | -1.7445            |
| hsa-miR-564     | 0.0018                     | -1.1696            |
| hsa-miR-361-5p  | 0.0019                     | 1.7082             |
| hsa-miR-661     | 0.0019                     | 2.6894             |
| hsa-miR-1245    | 0.0019                     | -1.4893            |
| hsa-miR-663     | 0.0019                     | -1.1924            |
| hsa-miR-10a*    | 0.0025                     | 2.4449             |
| hsa-miR-1228    | 0.0025                     | 2.7107             |
| hsa-miR-371-3p  | 0.0025                     | 2.5073             |
| hsa-miR-1252    | 0.0025                     | 2.4913             |
| hsa-miR-1294    | 0.0029                     | 2.4939             |
| hsa-miR-125a-3p | 0.0035                     | 2.3114             |
| hsa-miR-1182    | 0.0035                     | 2.5412             |
| hsa-miR-604     | 0.0036                     | -0.9863            |
| hsa-miR-149*    | 0.0042                     | -1.3721            |
| hsa-miR-30b*    | 0.0042                     | 2.5061             |
| hsa-miR-936     | 0.0044                     | -1.1207            |
| hsa-miR-630     | 0.0054                     | -1.6598            |
| hsa-miR-555     | 0.0055                     | -1.4407            |
| hsa-miR-765     | 0.0055                     | 2.5146             |
| hsa-miR-574-5p  | 0.0055                     | 1.3771             |
| hsa-miR-152     | 0.0055                     | -1.0956            |
| hsa-miR-623     | 0.0055                     | -1.0293            |
| hsa-miR-146b-3p | 0.0055                     | -1.2124            |
| hsa-miR-647     | 0.0060                     | -0.8588            |
| hsa-miR-191     | 0.0061                     | 0.5908             |
| hsa-miR-615-3p  | 0.0061                     | 2.2338             |
| hsa-miR-744     | 0.0068                     | 1.3246             |
| hsa-miR-340*    | 0.0070                     | 2.1039             |
| hsa-miR-654-3p  | 0.0074                     | 2.2696             |
| hsa-miR-514     | 0.0081                     | -1.4459            |
| hsa-miR-376c    | 0.0093                     | -1.0596            |
| hsa-miR-1295    | 0.0093                     | -1.1296            |
| hsa-miR-1293    | 0.0093                     | 2.2459             |

|                |        |         |
|----------------|--------|---------|
| hsa-miR-27a    | 0.0093 | 1.3196  |
| hsa-miR-500*   | 0.0093 | -0.9336 |
| hsa-miR-138-2* | 0.0104 | -1.2467 |
| hsa-miR-25*    | 0.0104 | -1.0918 |
| hsa-miR-509-5p | 0.0114 | -1.6264 |
| hsa-miR-208a   | 0.0115 | -1.1983 |
| hsa-miR-1255b  | 0.0115 | -0.9769 |
| hsa-miR-1231   | 0.0115 | -1.1062 |
| hsa-miR-499-5p | 0.0115 | -1.5990 |
| hsa-miR-30a*   | 0.0120 | 2.0528  |
| hsa-miR-331-5p | 0.0127 | 2.2579  |
| hsa-miR-32*    | 0.0128 | 2.1265  |
| hsa-miR-1281   | 0.0128 | 2.5557  |
| hsa-miR-1285   | 0.0129 | -1.0657 |
| hsa-miR-646    | 0.0130 | -1.1731 |
| hsa-miR-1228*  | 0.0130 | -1.0143 |
| hsa-miR-425*   | 0.0130 | -1.1418 |
| hsa-miR-379*   | 0.0130 | -1.1437 |
| hsa-miR-448    | 0.0133 | -1.2172 |
| hsa-miR-875-3p | 0.0136 | -1.2928 |
| hsa-miR-1226*  | 0.0139 | -1.2449 |
| hsa-miR-187    | 0.0141 | 1.8879  |
| hsa-miR-590-5p | 0.0149 | -0.7639 |
| hsa-miR-10b    | 0.0149 | -0.9386 |
| hsa-miR-370    | 0.0149 | 1.8858  |
| hsa-miR-593*   | 0.0149 | -0.9486 |
| hsa-miR-451    | 0.0149 | 1.2369  |
| hsa-miR-518f   | 0.0152 | -1.2092 |
| hsa-miR-10b*   | 0.0161 | -1.0831 |
| hsa-miR-571    | 0.0168 | -1.0688 |
| hsa-miR-187*   | 0.0170 | 1.4510  |
| hsa-miR-153    | 0.0170 | -0.9316 |
| hsa-miR-513b   | 0.0170 | 1.9438  |
| hsa-miR-410    | 0.0171 | -1.1225 |
| hsa-miR-133b   | 0.0171 | 1.8912  |
| hsa-miR-95     | 0.0171 | -1.6002 |
| hsa-miR-941    | 0.0171 | -0.5551 |
| hsa-miR-875-5p | 0.0171 | 1.9036  |
| hsa-miR-509-3p | 0.0171 | 1.9488  |
| hsa-miR-485-5p | 0.0171 | -1.1992 |
| hsa-miR-9*     | 0.0180 | 1.5571  |
| hsa-miR-592    | 0.0185 | 1.9507  |
| hsa-miR-1256   | 0.0188 | -0.9715 |
| hsa-miR-1469   | 0.0189 | -0.8533 |
| hsa-miR-1908   | 0.0190 | -1.1315 |
| hsa-miR-622    | 0.0196 | 1.8444  |

|                 |        |         |
|-----------------|--------|---------|
| hsa-miR-1267    | 0.0206 | 1.9466  |
| hsa-miR-1277    | 0.0206 | -0.9851 |
| hsa-miR-206     | 0.0206 | 1.9253  |
| hsa-miR-921     | 0.0213 | -0.9935 |
| hsa-miR-891a    | 0.0213 | -0.7434 |
| hsa-miR-504     | 0.0213 | 1.8828  |
| hsa-miR-1205    | 0.0213 | -0.9606 |
| hsa-miR-575     | 0.0214 | -0.7681 |
| hsa-miR-518d-5p | 0.0220 | -0.9349 |
| hsa-miR-522     | 0.0224 | 1.7510  |
| hsa-miR-363*    | 0.0225 | -0.9377 |
| hsa-miR-220b    | 0.0231 | -1.3002 |
| hsa-miR-628-5p  | 0.0231 | -0.8885 |
| hsa-miR-1255a   | 0.0233 | -1.2793 |
| hsa-miR-654-5p  | 0.0233 | -0.9531 |
| hsa-miR-450a    | 0.0233 | 1.7157  |
| hsa-miR-1271    | 0.0233 | 1.0419  |
| hsa-miR-106a*   | 0.0233 | -1.0166 |
| hsa-miR-548f    | 0.0238 | -1.2384 |
| hsa-miR-506     | 0.0238 | -1.2496 |
| hsa-miR-1234    | 0.0238 | 0.8889  |
| hsa-miR-135b    | 0.0238 | 1.6293  |
| hsa-miR-367     | 0.0238 | -0.6195 |
| hsa-miR-1306    | 0.0238 | 1.9215  |
| hsa-miR-1236    | 0.0243 | 1.9316  |
| hsa-miR-1266    | 0.0267 | -0.7287 |
| hsa-miR-1206    | 0.0286 | -0.9558 |
| hsa-miR-1258    | 0.0293 | 1.6074  |
| hsa-miR-612     | 0.0294 | -0.8315 |
| hsa-miR-510     | 0.0294 | -1.0697 |
| hsa-miR-1250    | 0.0294 | 1.9814  |
| hsa-miR-92b*    | 0.0294 | -0.8344 |
| hsa-miR-92a-2*  | 0.0295 | 1.7137  |
| hsa-miR-421     | 0.0295 | 1.6562  |
| hsa-miR-767-3p  | 0.0298 | -1.0443 |
| hsa-miR-223     | 0.0298 | 0.9417  |
| hsa-miR-124     | 0.0305 | -1.0012 |
| hsa-miR-885-3p  | 0.0315 | -0.8056 |
| hsa-miR-488*    | 0.0321 | -0.7644 |
| hsa-miR-125b-1* | 0.0322 | 1.7154  |
| hsa-miR-339-5p  | 0.0322 | 0.9007  |
| hsa-miR-933     | 0.0322 | -1.2407 |
| hsa-miR-432     | 0.0327 | 1.6014  |
| hsa-miR-501-3p  | 0.0327 | -0.6598 |
| hsa-miR-559     | 0.0327 | -0.8544 |
| hsa-miR-217     | 0.0327 | -1.0151 |

|                 |        |         |
|-----------------|--------|---------|
| hsa-miR-154     | 0.0343 | 1.5064  |
| hsa-miR-548e    | 0.0343 | -0.9260 |
| hsa-miR-216a    | 0.0343 | -0.8387 |
| hsa-miR-369-5p  | 0.0343 | -1.3171 |
| hsa-miR-1307    | 0.0343 | 1.5491  |
| hsa-miR-653     | 0.0343 | 1.6990  |
| hsa-miR-1237    | 0.0343 | 1.4459  |
| hsa-miR-1301    | 0.0345 | -1.0808 |
| hsa-miR-20a*    | 0.0346 | -0.8707 |
| hsa-miR-122*    | 0.0346 | -1.0492 |
| hsa-miR-618     | 0.0349 | 1.8014  |
| hsa-miR-520a-5p | 0.0352 | -0.7194 |
| hsa-miR-320a    | 0.0352 | -0.4379 |
| hsa-miR-449a    | 0.0356 | 1.5412  |
| hsa-miR-637     | 0.0356 | 1.6521  |
| hsa-miR-210     | 0.0356 | 0.9647  |
| hsa-miR-34a*    | 0.0362 | -0.8799 |
| hsa-miR-520e    | 0.0362 | 1.5779  |
| hsa-miR-423-5p  | 0.0362 | -0.5919 |
| hsa-miR-562     | 0.0362 | -1.2981 |
| hsa-miR-500     | 0.0362 | 1.4138  |
| hsa-miR-148b*   | 0.0362 | -1.1013 |
| hsa-miR-641     | 0.0362 | -0.8396 |
| hsa-miR-486-3p  | 0.0371 | 0.8049  |
| hsa-miR-148a*   | 0.0388 | 1.6554  |
| hsa-miR-548a-5p | 0.0390 | 1.6649  |
| hsa-miR-455-3p  | 0.0398 | -0.7721 |
| hsa-miR-143     | 0.0401 | -0.8444 |
| hsa-miR-483-3p  | 0.0401 | 1.7458  |
| hsa-miR-1299    | 0.0427 | -1.2840 |
| hsa-miR-939     | 0.0429 | 1.6855  |
| hsa-miR-542-3p  | 0.0433 | -0.9584 |
| hsa-miR-135b*   | 0.0437 | -0.7849 |
| hsa-miR-127-5p  | 0.0440 | -1.1766 |
| hsa-let-7b*     | 0.0442 | 1.6663  |
| hsa-miR-342-3p  | 0.0443 | -0.4983 |
| hsa-miR-146b-5p | 0.0443 | 1.2055  |
| hsa-miR-1289    | 0.0443 | -0.7678 |
| hsa-miR-431     | 0.0443 | -0.9457 |
| hsa-miR-487b    | 0.0443 | -0.6373 |
| hsa-miR-302e    | 0.0446 | 1.6045  |
| hsa-miR-519a*   | 0.0448 | -1.0809 |
| hsa-miR-302a    | 0.0448 | 1.4396  |
| hsa-miR-26b*    | 0.0448 | 1.4860  |
| hsa-miR-140-3p  | 0.0448 | -0.2847 |
| hsa-miR-491-3p  | 0.0448 | -0.9810 |

|              |        |         |
|--------------|--------|---------|
| hsa-let-7d   | 0.0460 | 1.3486  |
| hsa-miR-1270 | 0.0461 | -1.3362 |
| hsa-miR-182  | 0.0462 | -0.6083 |
| hsa-miR-101* | 0.0470 | 1.6450  |
| hsa-miR-1468 | 0.0473 | 1.3545  |

Supplementary Table S2: Circulating miRNAs experimentally validated in preeclampsia

| Experimentally validated miRNA | Reference PMID |
|--------------------------------|----------------|
| hsa-mir-122                    | 29800045       |
| hsa-mir-126                    | 29800045       |
| hsa-mir-146a                   | 29800045       |
| hsa-mir-152                    | 22095477       |
| hsa-mir-222                    | 29381395       |
| hsa-mir-126                    | 25738738       |
| hsa-mir-1301                   | 25064070       |
| hsa-mir-130a                   | 25738738       |
| hsa-mir-135b                   | 25738738       |
| hsa-mir-136                    | 30261165       |
| hsa-mir-142                    | 25738738       |
| hsa-mir-149                    | 25738738       |
| hsa-mir-155                    | 25981845       |
| hsa-mir-155                    | 28700503       |
| hsa-mir-188                    | 25738738       |
| hsa-mir-18a                    | 25738738       |
| hsa-mir-18b                    | 25738738       |
| hsa-mir-203                    | 25738738       |
| hsa-mir-205                    | 25738738       |
| hsa-mir-210                    | 24035613       |
| hsa-mir-210                    | 25981845       |
| hsa-mir-210                    | 28700503       |
| hsa-mir-210                    | 30324123       |
| hsa-mir-222                    | 25981845       |
| hsa-mir-223                    | 25064070       |
| hsa-mir-224                    | 25064070       |
| hsa-mir-224                    | 25738738       |
| hsa-mir-27a                    | 25738738       |
| hsa-mir-296                    | 25981845       |
| hsa-mir-29a                    | 25738738       |
| hsa-mir-29b                    | 25981845       |
| hsa-mir-301a                   | 25738738       |
| hsa-mir-376                    | 30186390       |
| hsa-mir-494                    | 30261165       |
| hsa-mir-495                    | 30261165       |
| hsa-mir-517c                   | 25738738       |
| hsa-mir-518                    | 25738738       |
| hsa-mir-518e                   | 25738738       |
| hsa-mir-519d                   | 25738738       |
| hsa-mir-93                     | 25738738       |
| hsa-mir-98                     | 25981845       |
| hsa-mir-103a-1                 | 22187671       |
| hsa-mir-103a-2                 | 22187671       |
| hsa-mir-103b-1                 | 22187671       |

|                |          |
|----------------|----------|
| hsa-mir-103b-2 | 22187671 |
| hsa-mir-106b   | 30277561 |
| hsa-mir-130b   | 22187671 |
| hsa-mir-181a-1 | 22187671 |
| hsa-mir-181a-2 | 22187671 |
| hsa-mir-210    | 22095477 |
| hsa-mir-24-1   | 22187671 |
| hsa-mir-24-2   | 22187671 |
| hsa-mir-26a-1  | 22187671 |
| hsa-mir-26a-2  | 22187671 |
| hsa-mir-326    | 30277561 |
| hsa-mir-342    | 22187671 |
| hsa-mir-574    | 22187671 |
| hsa-mir-885    | 26853698 |
| hsa-mir-17     | 26339600 |
| hsa-mir-21     | 28694210 |
